# Supplementary material for: On the viability of detrital biotite Rb–Sr geochronology
Source: Copernicus journal article supplement (doi:10.5194/gchron-6-303-2024), 2024-07-02
Supplement: Supplementary file 1 [file gchron-6-303-2024-supplement.zip]

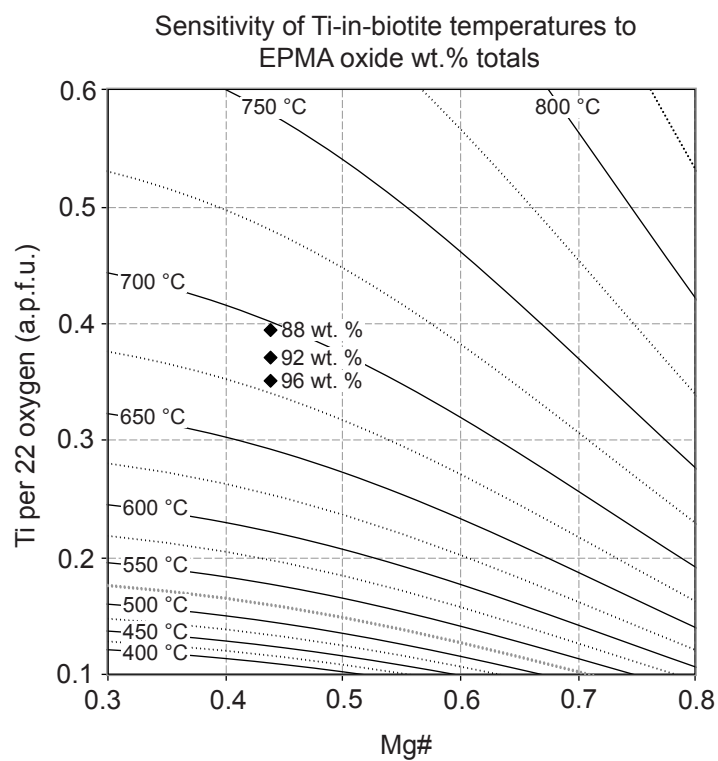

Figure S1: Plot showing the effect of changing total weight percent (wt. %) on the calculated Ti-in-biotite temperature.
