# Supplementary material for: On the viability of detrital biotite Rb–Sr geochronology
Source: Copernicus journal article supplement (doi:10.5194/gchron-6-303-2024), 2024-07-02
Supplement: Supplementary file 2 [file gchron-6-303-2024-supplement.zip]

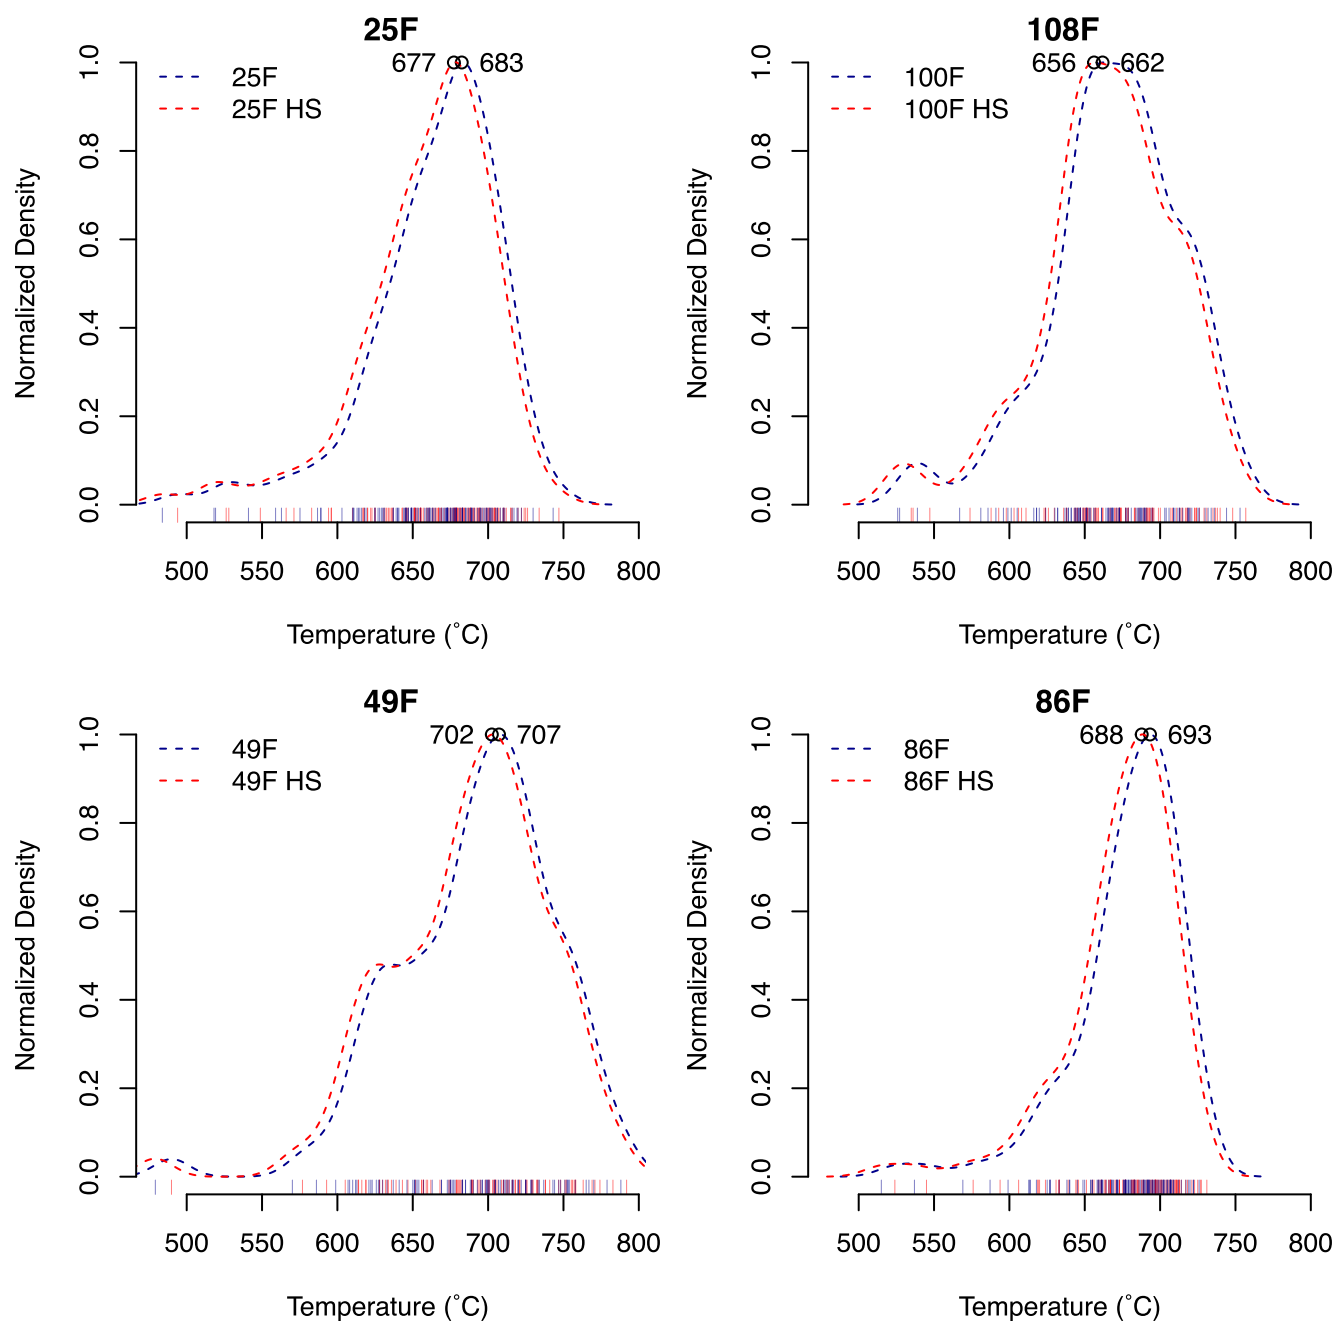

**Figure S2: Kernel density estimation (KDE) plots of Ti-in-biotite temperatures calculated from laser ablation inductively coupled plasma mass spectrometer data. The data that define the blue dashed lines were calculated assuming  $\text{SiO}_2$  weight percent (wt. %) = 35, whereas those that comprise the red dashed line were calculated with  $\text{SiO}_2$  wt. % = 40 (HS = high silica). The peaks of each KDE are as marked.**
