# Supplementary material for: On the viability of detrital biotite Rb–Sr geochronology
Source: Copernicus journal article supplement (doi:10.5194/gchron-6-303-2024), 2024-07-02
Supplement: Supplementary file 3 [file gchron-6-303-2024-supplement.zip]

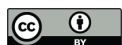

## *Supplement of*

# **On the viability of detrital biotite Rb–Sr geochronology**

**Kyle P. Larson et al.**

*Correspondence to:* Kyle P. Larson ([kyle.larson@ubc.ca](mailto:kyle.larson@ubc.ca))

- [gchron-6-303-2024-supplement-title-page.pdf](#)
- [Figure S1.pdf](#)
- [Figure S2.pdf](#)
- [Table S1.xlsx](#)
- [Table S2.xlsx](#)
- [Table S3.xlsx](#)
- [Table S4 1450-24-25F Dates.csv](#)
- [Table S5 1450-100-104-108F Dates.csv](#)
- [Table S6 1451-47-49F Dates.csv](#)
- [Table S7 1451-86F Dates.csv](#)

The copyright of individual parts of the supplement might differ from the article licence.
